# Supplementary material
Source: publisher figshare collection journal article supplement (https://rs.figshare.com/ndownloader/files/20554932)
Supplement: Supplementary file 1 [file 20554932]

**Table S4**. Midge sequences included in this study with their GenBank accession numbers. Midges in alcohol are kept in the collection of the first author. Some midges collected on 18/20 June 2013 in Tingjingshan National Forest Park on flowers of *Kadsura coccinea* were sent to R. Gagné, Taxonomic Services Unit, USDA-ARS-Systematic Entomology Laboratory, Beltsville, MD, for identification. Vouchers for the sequenced plant material are shown in Table S3.

| **Plant species** | ***Resseliella*** | **GenBank accession #** | **Number of locations and midge species** | **Study sites followed by their numbers in Fig. S1** |
| --- | --- | --- | --- | --- |
| *Illicium dunnianum* | *R. spec.*17*_ex_Illicium dunnianum* | KY569051 | 1 location, 1 midge species, specificity hence unknown | Nankunshan, Guangdong, China ⑩ |
| *Illicium henryi* | *R. spec.*22*_ex_Illicium henryi* | KY569052 | 1 location, 1 midge species, specificity hence unknown | Guangwushan, Sichuan, China ① |
| *Illicium lanceolatum* | *R. spec.*7*_ex_Illicium lanceolatum* | KY569058  KY569059  KY569060  KY569061  KY569062 | **2 locations, both with the same midge species** | Tianmushan, Zhejian, China ⑯  Hengshan, Hunan, China ⑫ |
| *Illicium majus* | *R. spec.* 9*_ex_Illicium majus*  *R. spec.*23*_ex_Illicium majus* | KY569063  KY569064 | **1 location, but two pollinating midge species** | Daweishan, Yunnan, China ⑤ |
| *Illicium micranthum* | *R. spec.*8*_ex _Illicium micranthum* | KY569053  KY569054  KY569055  KY569056  KY569057 | **3 locations, all with the same midge species** | Jinfoshan, Chongqing, China ③  Emeishan, Sichuan, China ②  Xiangtoushan (Other side of Pinganshan), Guangdong, China ⑨ |
| *Illicium oligandrum* | *R. spec.*13*_ex_Illicium oligandrum* | KY569066  KY569067 | 1 location, 1 midge species, specificity hence unknown | Fangchen, Guangxi, China ⑦ |
| *Illicium petelotii* | *R. spec.*14*_ex_Illicium petelotii* | Poor sequence | Poor sequence, specificity hence unknown | Laojunshan (other side of Daweihan), Yunnan, China ⑤ |
| *Illicium spec. Cui 184* | *R. spec.*11*_ex_ Illicium sp._F. Cui 184* | KY569065 | 1 location, 1 midge species, specificity hence unknown | Tianjinshan, Guangdong, China ⑪ |
| *Illicium tsangii* | R. spec._ex_*Illicium tsangii* | Not sequenced | 1 location, midge not sequenced | Nankunshan, Guangdong ⑩ |
| *Illicium verum* | *R. spec.*16*_ex_*[*Illicium verum*](http://www.ncbi.nlm.nih.gov/Taxonomy/Browser/wwwtax.cgi?mode=Info&id=124778&lvl=3&lin=f&keep=1&srchmode=1&unlock) | KY569068  KY569069  KY569070  KY569071  KY569072 | **3 sub-populations, all with the same midge species** | Nanning (near town Gaofeng), Guangxi, China ⑥ |
| *Kadsura coccinea* | *R. spec.*1*_ex_Kadsura coccinea* | KY498735  KY498736  KY498737 | **3 sub-populations, all with the same midge species** | Tianjinshan, Guangdong, China ⑪ |
| *Kadsura heteroclita* | *R. spec.* 2*_ex_Kadsura heteroclita* | KY498738  KY498739 | 1 location, 1 midge species, specificity hence unknown | Pinganshan, Guangdong, China ⑨ |
| *Kadsura longipedunculata* | *R. spec._ex_Kadsura*  *longipedunculata* | KY498740  KY498741  AB540124 | **2 locations, both with the same midge species** | Hengshan, Hunan, China ⑫  Langshan, Hunan, China ⑰ |
| *Kadsura oblongifolia* | *R. spec. 18_ex_Kadsura_oblongifolia* | KY498742  KY498743  KY498744  KY498745 | 1 location, 1 midge species, specificity hence unknown | Danzhou, Hainan, China ⑧ |
| [*Schisandra henryi*](http://www.ncbi.nlm.nih.gov/Taxonomy/Browser/wwwtax.cgi?mode=Info&id=13674&lvl=3&lin=f&keep=1&srchmode=1&unlock) | *R. spec.*6*_ex_Schisandra henryi* | KY569037  KY569038  KY569039 | 1 location, 1 midge species, specificity hence unknown (midges from 2n location ⑪ not sequenced) | Emeishan, Sichuan, China ② |
| [*Schisandra rubriflora*](http://www.ncbi.nlm.nih.gov/Taxonomy/Browser/wwwtax.cgi?mode=Info&id=13674&lvl=3&lin=f&keep=1&srchmode=1&unlock) | *R. spec.*3*_ex_Schisandra rubriflora* | KY569040  KY569041 | 1 location, 1 midge species, specificity hence unknown | Emeishan, Sichuan, China ② |
| *Schisandra spec.* SX. Luo 761 | *R. spec.*10*_ex_Schisandra spec._*SX. Luo 761 | KY569034 | 1 location, 1 midge species, specificity hence unknown | Daweishan, Yunnan, China ⑤ |
| *Schisandra* *spec.*_ZWWang 193 | *R. spec.*4*_ex_Schisandra sp.*_ZWWang 193 | KY569045  KY569046 | 1 location, 1 midge species, specificity hence unknown | Hengshan, Hunan, China ⑫ |
| [*Schisandra sphaerandra*](http://www.ncbi.nlm.nih.gov/Taxonomy/Browser/wwwtax.cgi?mode=Info&id=13674&lvl=3&lin=f&keep=1&srchmode=1&unlock) | *R. spec.*20*_ex_Schisandra sphaerandra* | KY569042  KY569043  KY569044 | 1 location, 1 midge species, specificity hence unknown | Dawashan (one of the hills of Emeishan), Sichuan, China ② |
| [*Schisandra sphenanthera*](http://www.ncbi.nlm.nih.gov/Taxonomy/Browser/wwwtax.cgi?mode=Info&id=13674&lvl=3&lin=f&keep=1&srchmode=1&unlock) | *R. spec.*10*_ex_*[*Schisandra sphenanthera*](http://www.ncbi.nlm.nih.gov/Taxonomy/Browser/wwwtax.cgi?mode=Info&id=13674&lvl=3&lin=f&keep=1&srchmode=1&unlock)  *R. spec.*19*_ex_*[*Schisandra sphenanthera*](http://www.ncbi.nlm.nih.gov/Taxonomy/Browser/wwwtax.cgi?mode=Info&id=13674&lvl=3&lin=f&keep=1&srchmode=1&unlock)  *R. spec.*21*_ex_Schisandra sphenanthera* | KY569035  KY569036  KY569047  KY569048  KY569049  KY569050 | **3 locations, each with a different midge pollinator** | Hengshan, Hunan, China ⑫  Emeishan, Sichuan, China ②  Lushan, Jiangxi, China ⑰ |
